# Supplementary material
Source: PubMed Central journal article supplement (PMC1488911)
Supplement: plntcell_tpc.106.042184_1.pdf [file plntcell_tpc.106.042184_1.pdf]

**Supplemental Table 1.** Genetic Analysis of *sta1-1* Mutant (Wild Type × *sta1-1*)<sup>a</sup>

| Generation | Number of Seedlings | Wild Type <sup>b</sup> | <i>sta1-1</i> | $\chi^2$ | <i>p</i> |
|------------|---------------------|------------------------|---------------|----------|----------|
| F1         | 31                  | 31                     | 0             |          |          |
| F2         | 314                 | 242                    | 72            | 0.043    | 0.835    |

a Female x Male

b For luminescence phenotype, seedling with intensities higher than  $1 \times 10^6$  counts per seedling after stress were considered to be *sta1-1* mutant.

**Supplemental Table 2.** Predicted domains in STA1 protein

| <b>Database</b> | <b>Accession</b> | <b>Domain</b>                         | <b>Position</b> |
|-----------------|------------------|---------------------------------------|-----------------|
| prosite         | PS50053          | Ubiquitin domain                      | 1-85            |
| pfam            | PF06424          | PRP1 splicing factor, N-terminal      | 102-266         |
| pfam            | PF02184          | RNA-processing protein, HAT helix     | 367-399         |
| smart           | SM00386          | RNA-processing protein, HAT helix     | 401-433         |
| pfam            | PF02184          | RNA-processing protein, HAT helix     | 431-463         |
| smart           | SM00386          | RNA-processing protein, HAT helix     | 462-494         |
| pfam            | PF02184          | RNA-processing protein, HAT helix     | 492-524         |
| smart           | SM00386          | RNA-processing protein, HAT helix     | 522-554         |
| pfam            | PF02184          | RNA-processing protein, HAT helix     | 570-600         |
| prosite         | PS00015          | Bipartite nuclear localization signal | 624-641         |
| pfam            | PF02184          | RNA-processing protein, HAT helix     | 639-671         |
| smart           | SM00386          | RNA-processing protein, HAT helix     | 707-739         |
| pfam            | PF02184          | RNA-processing protein, HAT helix     | 741-772         |
| pfam            | PF07719          | TPR repeat 2                          | 760-793         |
| smart           | SM00386          | RNA-processing protein, HAT helix     | 774-806         |
| pfam            | PF00515          | TPR repeat 1                          | 794-827         |
| pfam            | PF02184          | RNA-processing protein, HAT helix     | 808-840         |
| pfam            | PF07719          | TPR repeat 2                          | 828-861         |
| smart           | SM00386          | RNA-processing protein, HAT helix     | 842-874         |
| pfam            | PF07719          | TPR repeat 2                          | 862-895         |
| smart           | SM00386          | RNA-processing protein, HAT helix     | 876-908         |
| smart           | SM00028          | TPR repeat                            | 926-959         |
| pfam            | PF02184          | RNA-processing protein, HAT helix     | 940-972         |
