# Supplementary material
Source: PubMed Central journal article supplement (PMC1488911)
Supplement: plntcell_tpc.106.042184_2.pdf [file plntcell_tpc.106.042184_2.pdf]

**Supplemental Table 2.** Predicted domains in STA1 protein

| <b>Database</b> | <b>Accession</b> | <b>Domain</b>                         | <b>Position</b> |
|-----------------|------------------|---------------------------------------|-----------------|
| prosite         | PS50053          | Ubiquitin domain                      | 1-85            |
| pfam            | PF06424          | PRP1 splicing factor, N-terminal      | 102-266         |
| pfam            | PF02184          | RNA-processing protein, HAT helix     | 367-399         |
| smart           | SM00386          | RNA-processing protein, HAT helix     | 401-433         |
| pfam            | PF02184          | RNA-processing protein, HAT helix     | 431-463         |
| smart           | SM00386          | RNA-processing protein, HAT helix     | 462-494         |
| pfam            | PF02184          | RNA-processing protein, HAT helix     | 492-524         |
| smart           | SM00386          | RNA-processing protein, HAT helix     | 522-554         |
| pfam            | PF02184          | RNA-processing protein, HAT helix     | 570-600         |
| prosite         | PS00015          | Bipartite nuclear localization signal | 624-641         |
| pfam            | PF02184          | RNA-processing protein, HAT helix     | 639-671         |
| smart           | SM00386          | RNA-processing protein, HAT helix     | 707-739         |
| pfam            | PF02184          | RNA-processing protein, HAT helix     | 741-772         |
| pfam            | PF07719          | TPR repeat 2                          | 760-793         |
| smart           | SM00386          | RNA-processing protein, HAT helix     | 774-806         |
| pfam            | PF00515          | TPR repeat 1                          | 794-827         |
| pfam            | PF02184          | RNA-processing protein, HAT helix     | 808-840         |
| pfam            | PF07719          | TPR repeat 2                          | 828-861         |
| smart           | SM00386          | RNA-processing protein, HAT helix     | 842-874         |
| pfam            | PF07719          | TPR repeat 2                          | 862-895         |
| smart           | SM00386          | RNA-processing protein, HAT helix     | 876-908         |
| smart           | SM00028          | TPR repeat                            | 926-959         |
| pfam            | PF02184          | RNA-processing protein, HAT helix     | 940-972         |

**Supplemental Table 3.** List of genes with expression level significantly higher more than 2 times in *sta1-1* than in the wild type

| Probe ID    | Fold Change | p-value | AGI ID    | Gene Name                                                    |
|-------------|-------------|---------|-----------|--------------------------------------------------------------|
| 260522_x_at | 15.98       | 0.05    | At2g41730 | expressed protein                                            |
| 263402_at   | 14.62       | 0.03    | At2g04050 | MATE efflux family protein                                   |
| 248434_at   | 10.91       | 0.02    | At5g51440 | 23.5 kDa mitochondrial small heat shock protein (HSP23.5-M)  |
| 247615_at   | 9.43        | 0.01    | At5g60250 | zinc finger (C3HC4-type RING finger) family protein          |
| 263515_at   | 8.28        | 0.03    | At2g21640 | expressed protein                                            |
| 264042_at   | 7.47        | 0.04    | At2g03760 | steroid sulfotransferase, putative                           |
| 263061_at   | 7.38        | 0.00    | At2g18190 | AAA-type ATPase family protein                               |
| 253894_at   | 6.61        | 0.04    | At4g27150 | 2S seed storage protein 2                                    |
| 263401_at   | 6.59        | 0.00    | At2g04070 | MATE efflux family protein                                   |
| 265422_at   | 6.25        | 0.02    | At2g20800 | pyridine nucleotide-disulphide oxidoreductase family protein |
| 255893_at   | 6.20        | 0.01    | At1g17960 | threonyl-tRNA synthetase, putative                           |
| 249784_at   | 6.15        | 0.02    | At5g24280 | expressed protein                                            |
| 245173_at   | 5.50        | 0.02    | At2g47520 | AP2 domain-containing transcription factor, putative         |
| 256989_at   | 4.02        | 0.03    | At3g28580 | AAA-type ATPase family protein                               |
| 256459_at   | 4.00        | 0.02    | At1g36180 | acetyl-CoA carboxylase 2 (ACC2)                              |
| 261192_at   | 3.81        | 0.02    | At1g32870 | no apical meristem (NAM) family protein                      |
| 265099_at   | 3.69        | 0.04    | At1g03990 | alcohol oxidase-related                                      |
| 266729_at   | 3.55        | 0.04    | At2g03130 | ribosomal protein L12 family protein                         |
| 265668_at   | 3.53        | 0.03    | At2g32020 | GCN5-related N-acetyltransferase (GNAT) family protein       |
| 251432_at   | 3.49        | 0.02    | At3g59820 | calcium-binding mitochondrial protein-related                |
| 251012_at   | 3.39        | 0.04    | At5g02580 | expressed protein                                            |
| 251282_at   | 3.23        | 0.03    | At3g61630 | AP2 domain-containing transcription factor, putative         |
| 266618_at   | 3.16        | 0.02    | At2g35480 | expressed protein                                            |
| 250024_at   | 3.15        | 0.02    | At5g18270 | no apical meristem (NAM) family protein                      |
| 266217_at   | 3.10        | 0.02    | At2g28820 | ribosomal protein L16 family protein                         |
| 252427_at   | 3.09        | 0.04    | At3g47640 | basic helix-loop-helix (bHLH) family protein                 |
| 246282_at   | 3.06        | 0.02    | At4g36580 | AAA-type ATPase family protein                               |
| 253890_s_at | 3.06        | 0.05    | At5g54100 | band 7 family protein                                        |
| 264821_at   | 2.96        | 0.04    | At1g03470 | kinase interacting family protein                            |
| 257809_at   | 2.91        | 0.02    | At3g27060 | ribonucleoside-diphosphate reductase small chain, putative   |
| 258418_at   | 2.79        | 0.02    | At3g16660 | expressed protein                                            |
| 247989_at   | 2.74        | 0.04    | At5g56350 | pyruvate kinase, putative                                    |
| 264868_at   | 2.65        | 0.04    | At1g24090 | RNase H domain-containing protein                            |
| 250196_at   | 2.61        | 0.02    | At5g14580 | polyribonucleotide nucleotidyltransferase, putative          |
| 256132_at   | 2.59        | 0.03    | At1g13610 | expressed protein                                            |
| 260227_at   | 2.57        | 0.04    | At1g74450 | expressed protein                                            |
| 255430_at   | 2.55        | 0.04    | At4g03320 | chloroplast protein import component-related                 |
| 267162_s_at | 2.51        | 0.04    | At2g37690 | phosphoribosylaminoimidazole carboxylase family protein      |
