# Supplementary material
Source: PubMed Central journal article supplement (PMC1488911)
Supplement: plntcell_tpc.106.042184_3.pdf [file plntcell_tpc.106.042184_3.pdf]

**Supplemental Table 3.** List of genes with expression level significantly higher more than 2 times in *sta1-1* than in the wild type

| Probe ID    | Fold Change | p-value | AGI ID    | Gene Name                                                    |
|-------------|-------------|---------|-----------|--------------------------------------------------------------|
| 260522_x_at | 15.98       | 0.05    | At2g41730 | expressed protein                                            |
| 263402_at   | 14.62       | 0.03    | At2g04050 | MATE efflux family protein                                   |
| 248434_at   | 10.91       | 0.02    | At5g51440 | 23.5 kDa mitochondrial small heat shock protein (HSP23.5-M)  |
| 247615_at   | 9.43        | 0.01    | At5g60250 | zinc finger (C3HC4-type RING finger) family protein          |
| 263515_at   | 8.28        | 0.03    | At2g21640 | expressed protein                                            |
| 264042_at   | 7.47        | 0.04    | At2g03760 | steroid sulfotransferase, putative                           |
| 263061_at   | 7.38        | 0.00    | At2g18190 | AAA-type ATPase family protein                               |
| 253894_at   | 6.61        | 0.04    | At4g27150 | 2S seed storage protein 2                                    |
| 263401_at   | 6.59        | 0.00    | At2g04070 | MATE efflux family protein                                   |
| 265422_at   | 6.25        | 0.02    | At2g20800 | pyridine nucleotide-disulphide oxidoreductase family protein |
| 255893_at   | 6.20        | 0.01    | At1g17960 | threonyl-tRNA synthetase, putative                           |
| 249784_at   | 6.15        | 0.02    | At5g24280 | expressed protein                                            |
| 245173_at   | 5.50        | 0.02    | At2g47520 | AP2 domain-containing transcription factor, putative         |
| 256989_at   | 4.02        | 0.03    | At3g28580 | AAA-type ATPase family protein                               |
| 256459_at   | 4.00        | 0.02    | At1g36180 | acetyl-CoA carboxylase 2 (ACC2)                              |
| 261192_at   | 3.81        | 0.02    | At1g32870 | no apical meristem (NAM) family protein                      |
| 265099_at   | 3.69        | 0.04    | At1g03990 | alcohol oxidase-related                                      |
| 266729_at   | 3.55        | 0.04    | At2g03130 | ribosomal protein L12 family protein                         |
| 265668_at   | 3.53        | 0.03    | At2g32020 | GCN5-related N-acetyltransferase (GNAT) family protein       |
| 251432_at   | 3.49        | 0.02    | At3g59820 | calcium-binding mitochondrial protein-related                |
| 251012_at   | 3.39        | 0.04    | At5g02580 | expressed protein                                            |
| 251282_at   | 3.23        | 0.03    | At3g61630 | AP2 domain-containing transcription factor, putative         |
| 266618_at   | 3.16        | 0.02    | At2g35480 | expressed protein                                            |
| 250024_at   | 3.15        | 0.02    | At5g18270 | no apical meristem (NAM) family protein                      |
| 266217_at   | 3.10        | 0.02    | At2g28820 | ribosomal protein L16 family protein                         |
| 252427_at   | 3.09        | 0.04    | At3g47640 | basic helix-loop-helix (bHLH) family protein                 |
| 246282_at   | 3.06        | 0.02    | At4g36580 | AAA-type ATPase family protein                               |
| 253890_s_at | 3.06        | 0.05    | At5g54100 | band 7 family protein                                        |
| 264821_at   | 2.96        | 0.04    | At1g03470 | kinase interacting family protein                            |
| 257809_at   | 2.91        | 0.02    | At3g27060 | ribonucleoside-diphosphate reductase small chain, putative   |
| 258418_at   | 2.79        | 0.02    | At3g16660 | expressed protein                                            |
| 247989_at   | 2.74        | 0.04    | At5g56350 | pyruvate kinase, putative                                    |
| 264868_at   | 2.65        | 0.04    | At1g24090 | RNase H domain-containing protein                            |
| 250196_at   | 2.61        | 0.02    | At5g14580 | polyribonucleotide nucleotidyltransferase, putative          |
| 256132_at   | 2.59        | 0.03    | At1g13610 | expressed protein                                            |
| 260227_at   | 2.57        | 0.04    | At1g74450 | expressed protein                                            |
| 255430_at   | 2.55        | 0.04    | At4g03320 | chloroplast protein import component-related                 |
| 267162_s_at | 2.51        | 0.04    | At2g37690 | phosphoribosylaminoimidazole carboxylase family protein      |

|             |      |      |           |                                                                                                     |
|-------------|------|------|-----------|-----------------------------------------------------------------------------------------------------|
| 258235_at   | 2.49 | 0.02 | At3g27620 | alternative oxidase 1c, mitochondrial (AOX1C)                                                       |
| 267627_at   | 2.43 | 0.05 | At2g42270 | U5 small nuclear ribonucleoprotein helicase, putative                                               |
| 253013_at   | 2.43 | 0.04 | At4g37910 | heat shock protein 70, mitochondrial, putative                                                      |
| 256858_at   | 2.39 | 0.02 | At3g15140 | exonuclease family protein                                                                          |
| 259409_at   | 2.38 | 0.02 | At1g13330 | expressed protein                                                                                   |
| 264895_at   | 2.32 | 0.03 | At1g23100 | 10 kDa chaperonin, putative                                                                         |
| 264460_at   | 2.32 | 0.02 | At1g10170 | NF-X1 type zinc finger family protein                                                               |
| 251985_at   | 2.30 | 0.03 | At3g53220 | thioredoxin family protein                                                                          |
| 247431_at   | 2.26 | 0.04 | At5g62520 | expressed protein                                                                                   |
| 256852_at   | 2.25 | 0.01 | At3g18610 | nucleolin, putative                                                                                 |
| 259143_at   | 2.25 | 0.03 | At3g10190 | calmodulin, putative                                                                                |
| 257724_at   | 2.20 | 0.05 | At3g18510 | expressed protein                                                                                   |
| 256188_at   | 2.20 | 0.02 | At1g30160 | expressed protein                                                                                   |
| 247317_at   | 2.19 | 0.04 | At5g64060 | no apical meristem (NAM) family protein                                                             |
| 258029_at   | 2.19 | 0.03 | At3g27580 | protein kinase, putative                                                                            |
| 255685_s_at | 2.19 | 0.02 | At4g00600 | tetrahydrofolate dehydrogenase/cyclohydrolase, putative                                             |
| 257066_at   | 2.15 | 0.03 | At3g18280 | protease inhibitor/seed storage/lipid transfer protein (LTP) family protein                         |
| 245879_at   | 2.15 | 0.05 | At5g09420 | chloroplast outer membrane translocon subunit, putative                                             |
| 265340_at   | 2.14 | 0.05 | At2g18330 | AAA-type ATPase family protein                                                                      |
| 258170_at   | 2.10 | 0.05 | At3g21600 | senescence/dehydration-associated protein-related                                                   |
| 259582_at   | 2.09 | 0.02 | At1g28060 | small nuclear ribonucleoprotein family protein                                                      |
| 252305_at   | 2.09 | 0.04 | At3g49240 | pentatricopeptide (PPR) repeat-containing protein                                                   |
| 245063_at   | 2.07 | 0.04 | At2g39795 | mitochondrial glycoprotein family protein                                                           |
| 263902_at   | 2.06 | 0.02 | At2g36230 | N <sup>1</sup> -5'-phosphoribosyl-formimino-5-aminoimidazole-4-carboxamide ribonucleotide isomerase |
| 266668_at   | 2.06 | 0.02 | At2g29760 | pentatricopeptide (PPR) repeat-containing protein                                                   |
| 261187_at   | 2.05 | 0.03 | At1g32860 | glycosyl hydrolase family 17 protein                                                                |
| 246249_at   | 2.04 | 0.04 | At4g36680 | pentatricopeptide (PPR) repeat-containing protein                                                   |
| 257149_at   | 2.03 | 0.02 | At3g27280 | prohibitin, putative                                                                                |
| 261065_at   | 2.03 | 0.05 | At1g07500 | expressed protein                                                                                   |
| 265954_at   | 2.03 | 0.03 | At2g37260 | WRKY family transcription factor (TTG2)                                                             |
| 247575_at   | 2.03 | 0.05 | At5g61030 | RNA-binding protein, putative                                                                       |
| 258449_s_at | 2.02 | 0.05 | At3g22310 | DEAD box RNA helicase, putative                                                                     |
| 248605_at   | 2.01 | 0.02 | At5g49410 | expressed protein                                                                                   |

---
